# Supplementary material for: Wallacean shortfall precludes what? the relationship between landscape structure and primate diversity in the Atlantic Forest
Source: Research Square preprint supplement (doi:10.21203/rs.3.rs-6719344/v1), 2025-08-04
Supplement: Supplementary file 1 [file 2bfe751d465fde4f6a185452.docx]

**Wallacean shortfall precludes what? the relationship between landscape structure and primate diversity in the Atlantic Forest**.

Thairik Mateus Silva Marquesa*, Nicolas Silva Boscoa* Afonso Kempnera, Arielly Kerolly Ferraz Sousaa, Geovana Oliveira da Silvaa, Rodrigo Antônio Castro-Souzaa, Rafaela Rodrigues de Moraesb, Jessie Pereira Santosc, Laurence Culotd, Geiziane Tessaroloe, Rosane Garcia Collevattif & Thadeu Sobral-Souzag

**Table 1.** Occurrence records of Atlantic Forest primates obtained from the dataset "Community and Occurrence Data", which is linked to the complementary file "Table Well Sampled". The table includes species names, geographic coordinates (longitude and latitude in decimal degrees), year of observation, and the associated database.

LINK:

<https://drive.google.com/drive/folders/1AIoukcSFcs4UJ7lPPk-nkSCCUO6ITC6q>

**Table 2.** Loadings of the variables on the first two principal components (PC1 and PC2) obtained from Principal Component Analysis (PCA), representing gradients of landscape structure.

| **Variables** | **PC1** | **PC2** |
| --- | --- | --- |
| Distance to cities and roads | -0,052 | 0,801 |
| Homogeneity | 0,232 | 0,508 |
| Forest cover | 0,822 | 0,086 |
| Pacth size | 0,814 | 0,064 |
| Functional connectivity | 0,851 | -0,023 |
